# Supplementary material for: Aberrant Epigenetic Regulation in Head and Neck Cancer Due to Distinct EZH2 Overexpression and DNA Hypermethylation<strong> </strong>
Source: Preprints.org preprint supplement (doi:10.20944/preprints201810.0565.v1), 2018-10-24
Supplement: Supplementary file 1 [file supplementary]

**Table S2. Q-RT-PCR and Q-MSP primer list**

| PCR      | Gene    | Forward primer 5'-3'             | Reverse primer 5'-3'        |
|----------|---------|----------------------------------|-----------------------------|
| Q-RT-PCR | EZH2    | CCCTGACCTCTGTCTTACTTGTGGA        | ACGTCAGATGGTGCCAGCAATA      |
| Q-RT-PCR | DNMT3A  | AGTACGACGACGACGGCTA              | CACACTCCACGCAAAAGCAC        |
| Q-RT-PCR | DNMT3B  | AGGGAAGACTCGATCCTCGTC            | GTGTGTAGCTTAGCAGACTGG       |
| Q-RT-PCR | GAPDH   | GCACCGTCAAGGCTGAGAAC             | TGGTGAAGACGCCAGTCTCTA       |
| Q-MSP    | CCBE1   | GTCGCGGAGGAGTAGGACGCTT           | CTCGAAAACGACGACACCATC       |
| Q-MSP    | CDH1    | GTGGGCGGGTCGTTAGTTTC             | ACCACAACCAATCAACGCGA        |
| Q-MSP    | COL1A2  | ACGGTAGTAGGAGGTTTCGG             | CGCAAAACCCCTAAATCACCGACG    |
| Q-MSP    | DAPK    | GGATAGTCGGATCGAGTTAACGTC         | CCCTCCCAAACGCCGA            |
| Q-MSP    | GALR1   | GGTTCGCGGTATTCGGTAGT             | GGTTCGCGGTATTCGGTAGT        |
| Q-MSP    | MGMT    | TTCGACGTTCGTAGGTTTTTCGC          | GCACTCTTCCGAAAACGAAACG      |
| Q-MSP    | p16     | GTATTTTTTTCGAGTATTCGTTTACGGC     | CAAATCCTCTAAAAAAACCGCGA     |
| Q-MSP    | RASSF1A | CGTTCGGTTCGCGTTTGTTAGC           | TAACCCGATTAAACCCGTACTIONTCG |
| Q-MSP    | SALL3   | GGGGTTCGAGCGTCGTTAGT             | CCGTACTCGAAAACCCCGTC        |
| Q-MSP    | SST     | GGGGCGTTTTTTAGTTTGACGT           | AACAACGATAACTCCGAACCTCG     |
| Q-MSP    | TAC1    | GGCGGTAAATTAAATATTGAGCAGAAAGTCGC | AAATCCGAACGCGCTCTTTCG       |
| Q-MSP    | ACTB    | TGGTGATGGAGGAGGTTTAGTAAGT        | AACCAATAAAACCTACTCCTCCCTTAA |
