# Supplementary material for: Aberrant Epigenetic Regulation in Head and Neck Cancer Due to Distinct EZH2 Overexpression and DNA Hypermethylation<strong> </strong>
Source: Preprints.org preprint supplement (doi:10.20944/preprints201810.0565.v1), 2018-10-24
Supplement: Supplementary file 2 [file supplementary]

**Table S3. EZH2 expression status with the methylation of other eleven genes.**

| Genes   | Methylation status | High<br>(N = 75) | Low<br>(N = 141) | P-values <sup>†</sup> |
|---------|--------------------|------------------|------------------|-----------------------|
| CCBE1   | Methylated         | 51               | 70               | 0.010*                |
|         | Unmethylated       | 24               | 71               |                       |
| CDH1    | Methylated         | 34               | 74               | 0.322                 |
|         | Unmethylated       | 41               | 67               |                       |
| COL1A2  | Methylated         | 35               | 45               | 1                     |
|         | Unmethylated       | 40               | 96               |                       |
| DAPK    | Methylated         | 47               | 79               | 0.386                 |
|         | Unmethylated       | 28               | 62               |                       |
| GALR1   | Methylated         | 46               | 68               | 0.086                 |
|         | Unmethylated       | 29               | 73               |                       |
| MGMT    | Methylated         | 29               | 52               | 1                     |
|         | Unmethylated       | 46               | 89               |                       |
| p16     | Methylated         | 27               | 48               | 1                     |
|         | Unmethylated       | 48               | 93               |                       |
| RASSF1A | Methylated         | 10               | 25               | 0.444                 |
|         | Unmethylated       | 65               | 116              |                       |
| SALL3   | Methylated         | 51               | 72               | 0.021*                |
|         | Unmethylated       | 24               | 69               |                       |
| SST     | Methylated         | 66               | 116              | 0.329                 |
|         | Unmethylated       | 9                | 25               |                       |
| TAC1    | Methylated         | 52               | 85               | 0.235                 |
|         | Unmethylated       | 23               | 56               |                       |

<sup>†</sup> Fisher's exact probability test.

\* P <0.05.
