# Supplementary material for: Aberrant Epigenetic Regulation in Head and Neck Cancer Due to Distinct EZH2 Overexpression and DNA Hypermethylation<strong> </strong>
Source: Preprints.org preprint supplement (doi:10.20944/preprints201810.0565.v1), 2018-10-24
Supplement: Supplementary file 3 [file supplementary]

**Table S1. Baseline Characteristics of the 230 Patients.**

| Patient and tumor characteristics | Original cohort<br>(n = 110) | Validation cohort<br>(n = 120) | Original and Validation cohorts (n = 230) |
|-----------------------------------|------------------------------|--------------------------------|-------------------------------------------|
| <i>Age</i>                        |                              |                                |                                           |
| Under 70                          | 82 (74.5%)                   | 75 (62.5%)                     | 157 (68.3%)                               |
| 70 and older                      | 28 (25.5%)                   | 45 (37.5%)                     | 73 (31.7%)                                |
| <i>Gender</i>                     |                              |                                |                                           |
| Male                              | 87 (79.1%)                   | 103 (85.8%)                    | 190 (82.6%)                               |
| Female                            | 23 (20.9%)                   | 17 (14.2%)                     | 40 (17.4%)                                |
| <i>Alcohol exposure</i>           |                              |                                |                                           |
| Ever                              | 60 (54.5%)                   | 99 (82.5%)                     | 159 (69.1%)                               |
| Never                             | 50 (45.5%)                   | 21 (17.5%)                     | 71 (30.9%)                                |
| <i>Smoking status</i>             |                              |                                |                                           |
| Smoker                            | 72 (65.5%)                   | 93 (77.5%)                     | 165 (71.7%)                               |
| Non-smoker                        | 38 (34.5%)                   | 27 (22.5%)                     | 65 (28.3%)                                |
| <i>Tumor size</i>                 |                              |                                |                                           |
| T1                                | 11 (10.0%)                   | 12 (10.0%)                     | 23 (10.0%)                                |
| T2                                | 46 (41.8%)                   | 37 (30.8%)                     | 83 (36.1%)                                |
| T3                                | 21 (19.1%)                   | 26 (21.7%)                     | 47 (20.4%)                                |
| T4                                | 32 (29.1%)                   | 45 (37.5%)                     | 77 (33.5%)                                |
| <i>Lympho-node status</i>         |                              |                                |                                           |
| N0                                | 51 (46.4%)                   | 55 (45.8%)                     | 106 (46.1%)                               |
| N+                                | 59 (53.6%)                   | 65 (54.2%)                     | 124 (53.9%)                               |
| <i>Stage</i>                      |                              |                                |                                           |
| I                                 | 7 (6.4%)                     | 10 (8.3%)                      | 17 (7.4%)                                 |
| II                                | 26 (23.6%)                   | 18 (15.0%)                     | 44 (19.1%)                                |
| III                               | 19 (17.3%)                   | 24 (20.0%)                     | 43 (18.7%)                                |
| IV                                | 58 (52.7%)                   | 68 (56.7%)                     | 126 (54.8%)                               |
| <i>Recurrence events</i>          |                              |                                |                                           |
| Positive                          | 56 (50.9%)                   | 40 (33.3%)                     | 96 (41.7%)                                |
| Negative                          | 54 (49.1%)                   | 80 (66.7%)                     | 134 (58.3%)                               |
