# Supplementary material for: Aberrant Epigenetic Regulation in Head and Neck Cancer Due to Distinct EZH2 Overexpression and DNA Hypermethylation<strong> </strong>
Source: Preprints.org preprint supplement (doi:10.20944/preprints201810.0565.v1), 2018-10-24
Supplement: Supplementary file 4 [file supplementary]

Archive with 4 entries (4 files):
- Misawa K Figure S1.eps
- Misawa K Table S1.pdf
- Misawa K Table S2.pdf
- Misawa K Table S3.pdf
